# Supplementary material
Source: PubMed Central journal article supplement (PMC10505336)
Supplement: NIHMS1929213-supplement-1.pdf [file NIHMS1929213-supplement-1.pdf]

**Supplementary Table 1. Effect of Hormone Levels and Medication Dosing on Brain Region Volumes for Infants with CAH**

| Hormones                              | Brain Regions     |                  |                 |                  |                   |                              |
|---------------------------------------|-------------------|------------------|-----------------|------------------|-------------------|------------------------------|
|                                       | Whole-Brain       | Frontal          | Parietal        | Occipital        | Temporal          | Thalamus                     |
| <b>Androstenedione at diagnosis</b>   | - 4.02<br>(3.88)  | -1.19<br>(1.21)  | -0.73<br>(0.77) | -0.27<br>(0.60)  | -0.81<br>(0.68)   | -0.10<br>(0.05) <sup>†</sup> |
| <b>Newborn screen 17OHP</b>           | -0.82<br>(1.12)   | -0.22<br>(0.35)  | -0.14<br>(0.22) | -0.12<br>(0.17)  | -0.16<br>(0.20)   | -0.02<br>(0.02)              |
| <b>PRA at diagnosis [ln]</b>          | -17352<br>(11898) | -5676<br>(3520)  | -3501<br>(2268) | -3034<br>(1777)  | -2663<br>(2255)   | -38.4<br>(210.0)             |
| <b>Testosterone at diagnosis</b>      | -26.7<br>(49.4)   | -8.0<br>(15.3)   | -4.3<br>(9.8)   | -0.8<br>(7.4)    | -6.0<br>(8.8)     | -1.0<br>(0.7)                |
| <b>Glucocorticoid dose at imaging</b> | -7.2<br>(1200)    | -75.8<br>(371.3) | -7.5<br>(236.2) | 26.9<br>(178.4)  | -23.7<br>(213.9)  | 2.18<br>(17.7)               |
| <b>NaCl dose at imaging</b>           | -188.6<br>(5329)  | -193.5<br>(1651) | -50.6<br>(1049) | 211.1<br>(790.1) | -115.6<br>(949.5) | -39.3<br>(77.8)              |

*Abbreviations: 17OHP, 17-Hydroxyprogesterone; PRA, plasma renin activity*

Parameter estimates (standard errors): Each unit increase in hormone level or medication dose is associated with the value of the parameter estimate change in brain region volume.

Models adjusted for post-conceptual age, sex, and days of treatment.

<sup>†</sup>0.05 < *p* < 0.10, \**p* < 0.05, \*\**p* < 0.01, \*\*\**p* < 0.001
